# Supplementary material for: Comprehensive analysis of NAC transcription factor family uncovers drought and salinity stress response in pearl millet (Pennisetum glaucum)
Source: PubMed Central journal article supplement (PMC7818933; doi:10.1186/s12864-021-07382-y), 2021-01-21
Supplement: 12864_2021_7382_MOESM3_ESM.pdf [file 12864_2021_7382_MOESM3_ESM.pdf]

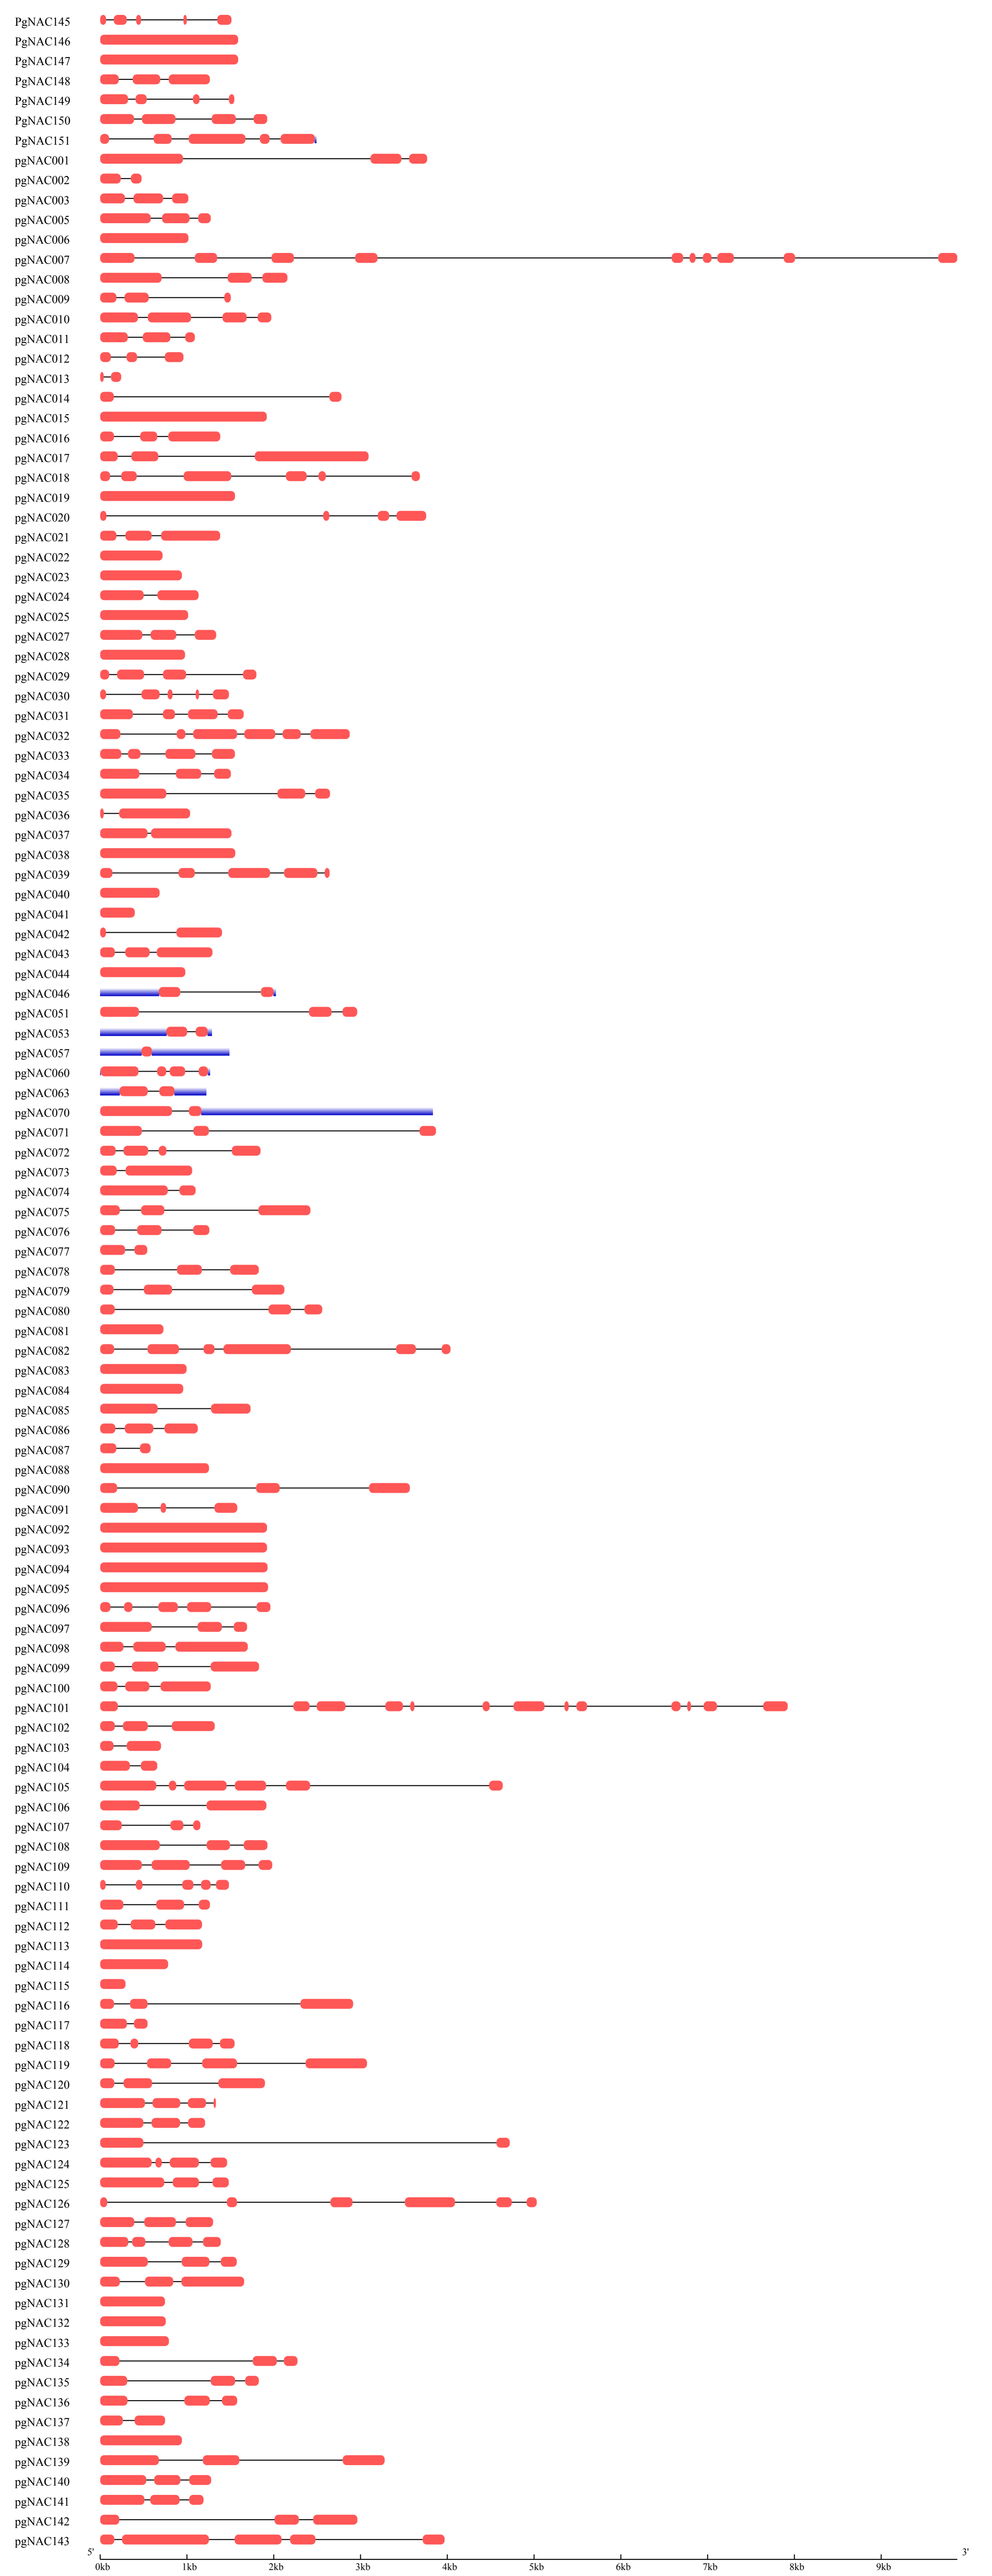

Legend: █ CDS █ upstream/ downstream  Intron
