# Supplementary material for: Comprehensive analysis of NAC transcription factor family uncovers drought and salinity stress response in pearl millet (Pennisetum glaucum)
Source: PubMed Central journal article supplement (PMC7818933; doi:10.1186/s12864-021-07382-y), 2021-01-21
Supplement: 12864_2021_7382_MOESM4_ESM.pdf [file 12864_2021_7382_MOESM4_ESM.pdf]

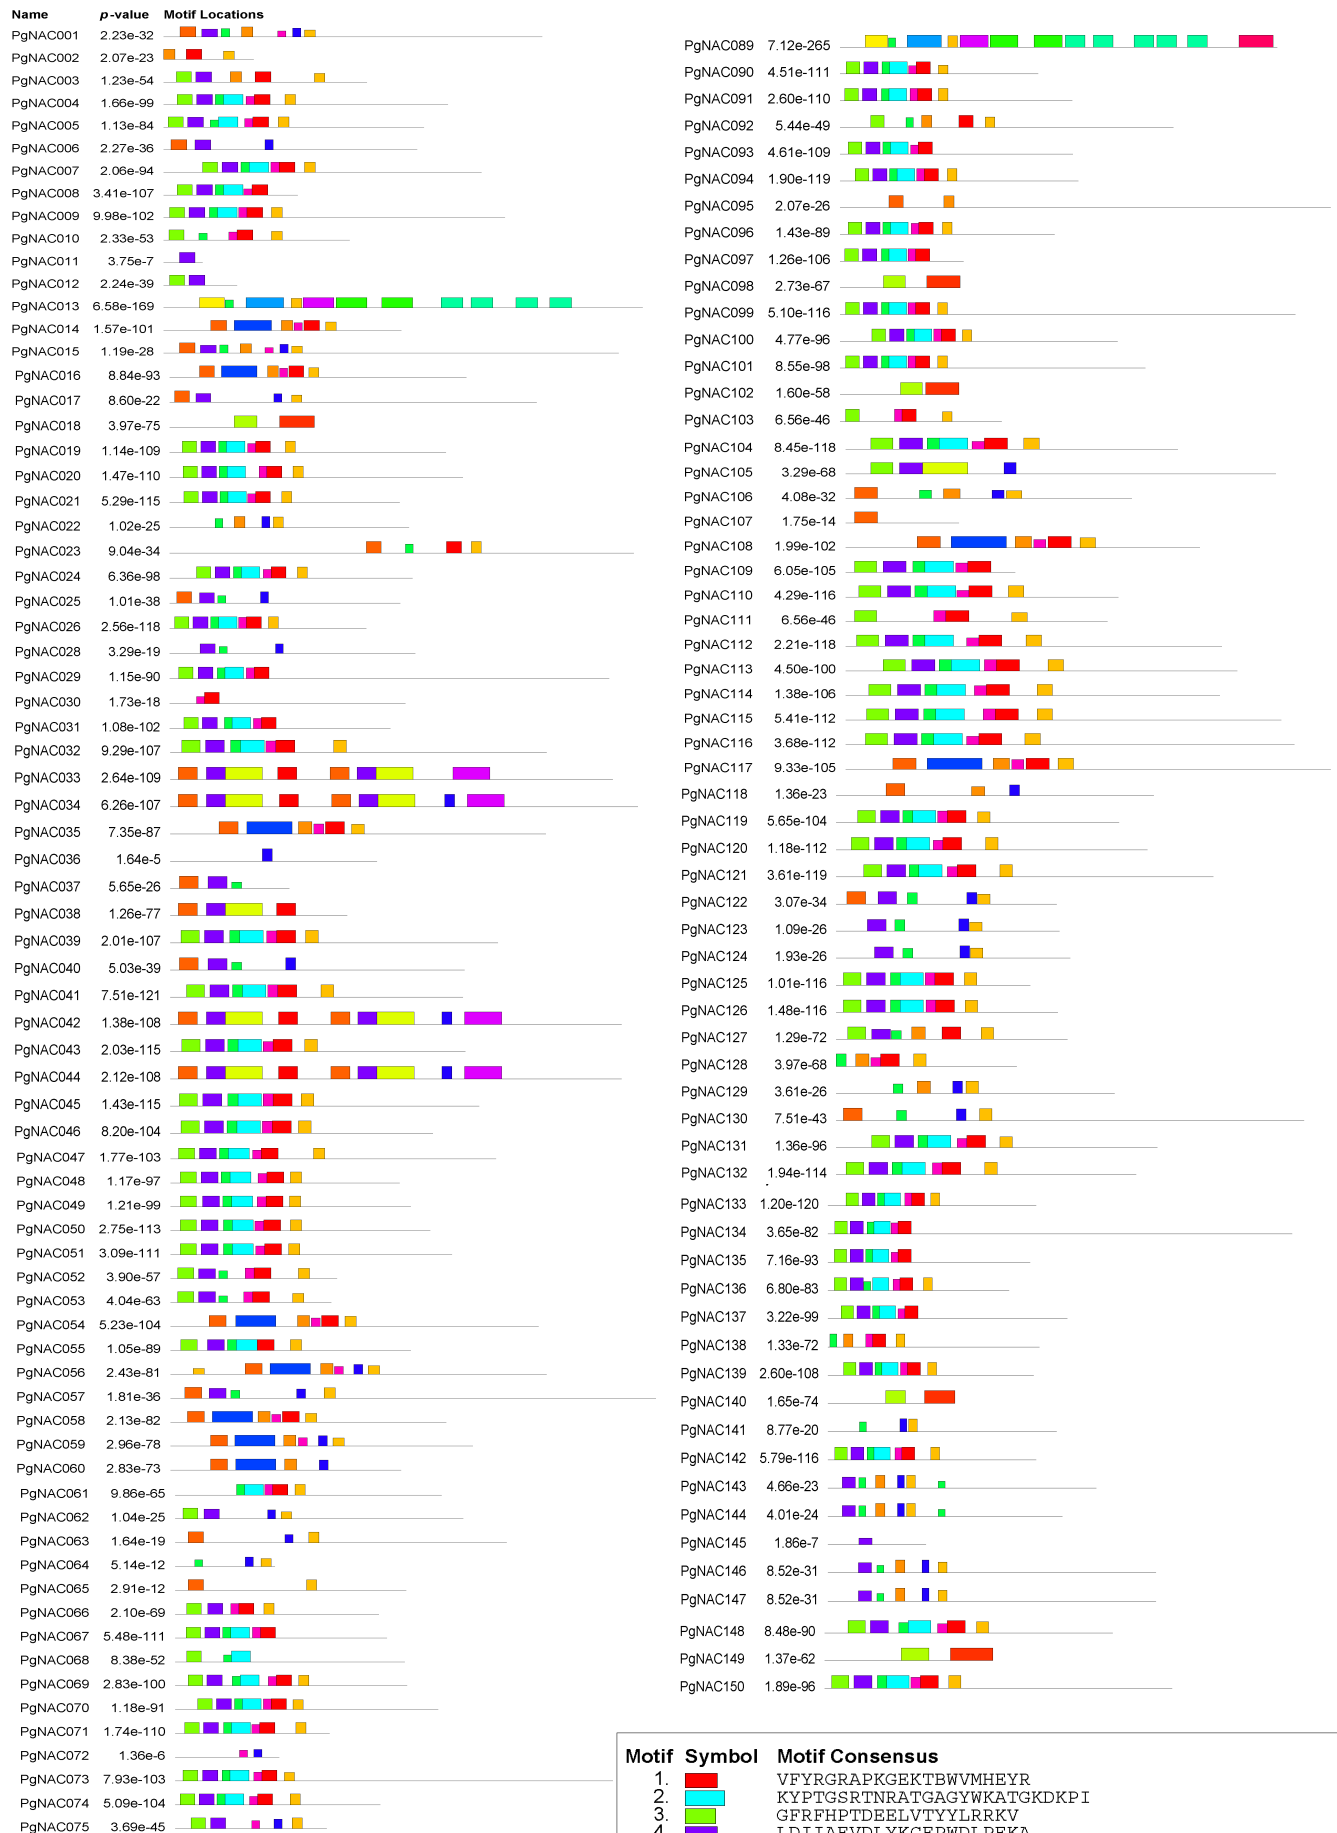

| Motif | Symbol | Motif Consensus                                   |
|-------|--------|---------------------------------------------------|
| 1.    | ■      | VFYRGRAPKGEKTBWVMHEYR                             |
| 2.    | ■      | KYPTGSRTRNATGAGYWKATGKDKPI                        |
| 3.    | ■      | GFRFHPTDBELVTYYLRRKV                              |
| 4.    | ■      | LDIAEVDLYKCEPWDLPEKA                              |
| 5.    | ■      | KDEWVLCRVYKKS                                     |
| 6.    | ■      | KEWYFFSPDR                                        |
| 7.    | ■      | LIDFIPITIEGEDGICYTHPEKLPVKKDGLVRHFHFRPSKAYTTGTRKR |
| 8.    | ■      | GGRLVGMKKTLL                                      |
| 9.    | ■      | LPPGVKFDPTDEELVEHYLLP                             |
| 11.   | ■      | SEQVSSVTMTATSRLESQGEAAKFEPEACHGKINDEAVDE          |
| 12.   | ■      | TSQKISSTSDYLTFSPEPEASQMSSTT                       |
| 13.   | ■      | TWHSERAPRAVLDEGNCVGHGTQYFSYKRKTKNCSERTDWMLEFTDGP  |
| 14.   | ■      | RTGWMHEYSL                                        |
| 15.   | ■      | RSSSSSHRSARKRKSSTEEHADPSSAPVKAKRRLFESSAPLL        |
| 18.   | ■      | AGEGRWHKTGKPKPV                                   |
| 19.   | ■      | AAAGSHFHESDIYAADPAMLTAGYLPAPVRKGE                 |
