# Supplementary material for: Comprehensive analysis of NAC transcription factor family uncovers drought and salinity stress response in pearl millet (Pennisetum glaucum)
Source: BMC Genomics. 2021 Jan 21;22:70. doi: 10.1186/s12864-021-07382-y (PMC7818933; doi:10.1186/s12864-021-07382-y)
Supplement: Supplementary file 2 — Additional file 2. Detail catalogue of NAC in pearl millet. [file 12864_2021_7382_MOESM2_ESM.xlsx]

## Sheet: Additional File 2
Additional File 2: Detail catalogue of NAC in pearl millet.
NAC gene number	Gene identfier	Pearl millet chromosome	Pearl millet position start (bp)	Pearl millet position end (bp)	Length (aa)	NAC and Other Domains	Exons	Introns	NCBI ID/Genebank /INSDC	Phylogeny Group
PgNAC001	Pgl_GLEAN_10036087_1	1	35755236	35751469	505	24 to 43	3	2	CM007982.2	B
PgNAC002	Pgl_GLEAN_10029179_1	1	36575173	36575649	119	27 to 52	2	1	CM007982.2	H
PgNAC003	Pgl_GLEAN_10004741_1	1	52851241	52850226	270	17 to 36	3	2	CM007982.2	I
PgNAC004	Pgl_GLEAN_10034696_1	1	76006275	76004891	347	17 to 143	……	…….	CM007982.2	I
PgNAC005	Pgl_GLEAN_10034718_1	1	76666584	76665311	338	5 to 136	3	2	CM007982.2	A
PgNAC006	Pgl_GLEAN_10024273_1	1	78004793	78005809	670	12 to 32	1	0	CM007982.2	K
PgNAC007	Pgl_GLEAN_10022431_1	1	178751453	178749296	179	51 to 176	10	9	CM007982.2	C
PgNAC008	Pgl_GLEAN_10023047_1	1	181457247	181458751	455	17 to 140	3	2	CM007982.2	I
PgNAC009	Pgl_GLEAN_10023064_1	1	182164982	182163011	248	7 to 27	3	2	CM007982.2	E
PgNAC010	Pgl_GLEAN_10013543_1	1	189162411	189161321	152	6 to 26	4	3	CM007982.2	A
PgNAC011	Pgl_GLEAN_10009388_1	1	197637303	197637062	98	1 to 52	3	2	CM007982.2	D
PgNAC012	Pgl_GLEAN_10035761_1	1	207804344	207807124	639	7 to 91	3	2	CM007982.2	E
PgNAC013	Pgl_GLEAN_10007172_1	1	215731387	215733306	317	11 to 158	2	1	CM007982.2	…….
PgNAC014	Pgl_GLEAN_10017552_1	1	230794481	230795864	607	182 to 209; 65 to 80	2	1	CM007982.2	A
PgNAC015	Pgl_GLEAN_10008886_1	1	235005250	235008342	419	23 to 42	1	0	CM007982.2	B
PgNAC016	Pgl_GLEAN_10027881_1	1	241972285	241975968	517	162 to 190	3	2	CM007982.2	C
PgNAC017	Pgl_GLEAN_10038207_1	1	270527242	270528795	204	9 to 28	3	2	CM007982.2	E
PgNAC018	Pgl_GLEAN_10004445_1	1	274580169	274583925	389	72 to 118; 167 to 203; 169 to 202	6	5	CM007982.2	B
PgNAC019	Pgl_GLEAN_10009908_1	1	274841173	274842555	413	17 to 143	1	0	CM007982.2	I
PgNAC020	Pgl_GLEAN_10009909_1	1	274849196	274849914	313	129 to 159	4	3	CM007982.2	H
PgNAC021	Pgl_GLEAN_10017870_1	2	1187614	1186481	337	19 to 143	3	2	CM007983.2	A
PgNAC022	Pgl_GLEAN_10017873_1	2	1266465	1265452	342	8 to 140	1	0	CM007983.2	D
PgNAC023	Pgl_GLEAN_10017877_1	2	1299760	1304462	325	279 to 412	1	0	CM007983.2	F
PgNAC024	Pgl_GLEAN_10004672_1	2	6944748	6943412	277	38 to 165	2	1	CM007983.2	A
PgNAC025	Pgl_GLEAN_10009699_1	2	9865086	9864109	185	12 to 32; 114 to 139	1	0	CM007983.2	K
PgNAC026	Pgl_GLEAN_10017371_1	2	30303099	30301300	346	6 to 130	……….	……..	CM007983.2	A
PgNAC027	Pgl_GLEAN_10016665_1	2	46688697	46690180	619	64 to 110	3	2	CM007983.2	D
PgNAC028	Pgl_GLEAN_10036192_1	2	59975083	59973430	332	12 to 180	1	0	CM007983.2	K
PgNAC029	Pgl_GLEAN_10001187_1	2	65235372	65232497	311	12 to 140	4	3	CM007983.2	K
PgNAC030	Pgl_GLEAN_10029882_1	2	66947416	66948968	417	43 to 71	5	4	CM007983.2	A
PgNAC031	Pgl_GLEAN_10021382_1	2	68299915	68298410	285	19 to 151	4	3	CM007983.2	A
PgNAC032	Pgl_GLEAN_10001651_1	2	75000046	74997398	490	12 to 139	6	5	CM007983.2	K
PgNAC033	Pgl_GLEAN_10035620_1	2	102077687	102076175	416	11 to 141; 179 to 303	4	3	CM007983.2	G
PgNAC034	Pgl_GLEAN_10029657_1	2	106401881	106403437	229	292 to 315; 181 to 201	3	2	CM007983.2	G
PgNAC035	Pgl_GLEAN_10001146_1	2	122884135	122886778	132	166 to 194 ; 56 to 71	3	2	CM007983.2	A
PgNAC036	Pgl_GLEAN_10032876_1	2	157129291	157128607	196	2 to 113	2	1	CM007983.2	C
PgNAC037	Pgl_GLEAN_10010150_1	2	169058428	169058030	363	12 to 32	2	1	CM007983.2	K
PgNAC038	Pgl_GLEAN_10035811_1	2	170430497	170429094	326	11 to 140	1	0	CM007983.2	G
PgNAC039	Pgl_GLEAN_10009026_1	2	189536471	189537764	399	11 to 140	5	4	CM007983.2	G
PgNAC040	Pgl_GLEAN_10027760_1	2	207354768	207353788	324	12 to 32; 114 to 139	1	0	CM007983.2	…….
PgNAC041	Pgl_GLEAN_10024408_1	3	1131466	1129443	327	17 to 141	1	0	CM007984.2	I
PgNAC042	Pgl_GLEAN_10015602_1	3	14094862	14092682	500	288 to 312	2	1	CM007984.2	G
PgNAC043	Pgl_GLEAN_10010555_1	3	16819463	16821891	342	12 to 136	3	2	CM007984.2	K
PgNAC044	Pgl_GLEAN_10015604_1	3	38674558	38675792	291	288 to 312	1	0	CM007984.2	G
PgNAC045	Pgl_GLEAN_10029317_1	3	44268364	44261540	405	9 to 136	……..	…..;	CM007984.2	E
PgNAC046	Pgl_GLEAN_10027239_1	3	47364385	47361424	285	11 to 135	2	1	CM007984.2	…….
PgNAC047	Pgl_GLEAN_10018520_1	3	55981516	55983634	299	10 to 135	……..	……..	CM007984.2	E
PgNAC048	Pgl_GLEAN_10023846_1	3	59476514	59475228	323	11 to 142	……..	……..	CM007984.2	G
PgNAC049	Pgl_GLEAN_10031107_1	3	67775234	67774442	350	11 to 140	……..	……..	CM007984.2	G
PgNAC050	Pgl_GLEAN_10028014_1	3	67790532	67789030	207	11 to 138	……..	……..	CM007984.2	G
PgNAC051	Pgl_GLEAN_10018897_1	3	67836006	67834504	200	11 to 139; 184 to 239	3	2	CM007984.2	G
PgNAC052	Pgl_GLEAN_10015598_1	3	90076438	90077924	458	8 to 125	……..	……..	CM007984.2	E
PgNAC053	Pgl_GLEAN_10023026_1	3	179886428	179890476	299	8 to 124	2	1	CM007984.2	E
PgNAC054	Pgl_GLEAN_10030181_1	3	225069791	225070597	468	182 to 210; 50 to 65	……..	……..	CM007984.2	C
PgNAC055	Pgl_GLEAN_10014518_1	3	227183321	227182055	604	12 to 32	……..	……..	CM007984.2	K
PgNAC056	Pgl_GLEAN_10031754_1	3	230844116	230845301	343	212 to 239	……..	……..	CM007984.2	G
PgNAC057	Pgl_GLEAN_10006998_1	3	240863297	240861213	376	20 to 40; 217 to 416; 244 to 396 259 to 494; 325 to 468; 226 to 527	1	0	CM007984.2	J
PgNAC058	Pgl_GLEAN_10012214_1	3	240882498	240881276	287	131 to 161; 23 to 40	……..	……..	CM007984.2	B
PgNAC059	Pgl_GLEAN_10026798_1	3	241390671	241391870	369	167 to 195	……..	……..	CM007984.2	E
PgNAC060	Pgl_GLEAN_10026799_1	3	242576201	242569105	399	52 to 196	4	3	CM007984.2	E
PgNAC061	Pgl_GLEAN_10002512_1	3	253448695	253448279	459	132 to 157	……..	……..	CM007984.2	A
PgNAC062	Pgl_GLEAN_10005564_1	3	255420030	255422245	138	232 to 355	……..	……..	CM007984.2	G
PgNAC063	Pgl_GLEAN_10031853_1	3	275380639	275378504	320	392 to 454; 410 to 455	2	1	CM007984.2	J
PgNAC064	Pgl_GLEAN_10018369_1	3	293697205	293700077	282	1 to 108	……..	……..	CM007984.2	C
PgNAC065	Pgl_GLEAN_10031068_1	3	300743485	300747316	293	20 to 181	……..	……..	CM007984.2	J
PgNAC066	Pgl_GLEAN_10020133_1	4	3668203	3664334	318	15 to 109	……..	……..	CM007985.2	I
PgNAC067	Pgl_GLEAN_10009054_1	4	17444925	17446772	321	14 to 140	……..	……..	CM007985.2	E
PgNAC068	Pgl_GLEAN_10022470_1	4	31416011	31417070	364	15 to 109	……..	……..	CM007985.2	I
PgNAC069	Pgl_GLEAN_10019790_1	4	37173492	37172393	214	17 to 35	……..	……..	CM007985.2	I
PgNAC070	Pgl_GLEAN_10028398_1	4	41345257	41347679	144	31 to 155	2	1	CM007985.2	D
PgNAC071	Pgl_GLEAN_10003069_1	4	47166386	47167643	677	12 to 139	3	2	CM007985.2	K
PgNAC072	Pgl_GLEAN_10024185_1	4	57204798	57204256	284	2 to 120	4	3	CM007985.2	F
PgNAC073	Pgl_GLEAN_10023934_1	4	62862823	62864650	210	10 to 141	2	1	CM007985.2	G
PgNAC074	Pgl_GLEAN_10023093_1	4	70779291	70781413	242	6 to 136	2	1	CM007985.2	A
PgNAC075	Pgl_GLEAN_10029616_1	4	88444696	88442138	585	21 to 41	3	2	CM007985.2	F
PgNAC076	Pgl_GLEAN_10018942_1	4	135092862	135092134	331	127 to 189	3	2	CM007985.2	C
PgNAC077	Pgl_GLEAN_10023690_1	4	148672862	148668826	318	2 to 27; 145 to 226	2	1	CM007985.2	B
PgNAC078	Pgl_GLEAN_10002637_1	4	168833822	168832827	372	11 to 31	3	2	CM007985.2	G
PgNAC079	Pgl_GLEAN_10002636_1	4	168837956	168837000	295	11 to 31	3	2	CM007985.2	G
PgNAC080	Pgl_GLEAN_10018456_1	4	172729749	172728017	102	10 to 133	3	2	CM007985.2	G
PgNAC081	Pgl_GLEAN_10010851_1	4	187468909	187470033	417	12 to 32	1	0	CM007985.2	K
PgNAC082	Pgl_GLEAN_10013842_1	4	189414701	189415281	312	2 to 80	6	5	CM007985.2	G
PgNAC083	Pgl_GLEAN_10033241_1	4	190403144	190401891	253	144 to 317; 130 to 373; 165 to 317; 163 to 286; 215 to 316; 167 to 278	1	0	CM007985.2	G
PgNAC084	Pgl_GLEAN_10023967_1	5	72858818	72862386	640	14 to 143	1	0	CM007986.2	E
PgNAC085	Pgl_GLEAN_10032139_1	5	85534587	85533008	642	21 to 39	2	1	CM007986.2	J
PgNAC086	Pgl_GLEAN_10011855_1	5	88118708	88120630	644	18 to 148	3	2	CM007986.2	G
PgNAC087	Pgl_GLEAN_10011852_1	5	88133354	88135276	292	15 to 146	2	1	CM007986.2	G
PgNAC088	Pgl_GLEAN_10011851_1	5	88159565	88161493	342	18 to 148	1	0	CM007986.2	G
PgNAC089	Pgl_GLEAN_10011849_1	5	88172971	88174905	491	18 to 148	……..	……..	CM007986.2	G
PgNAC090	Pgl_GLEAN_10028790_1	5	97239147	97237186	343	8 to 134	3	2	CM007986.2	E
PgNAC091	Pgl_GLEAN_10001319_1	5	102379720	102378028	351	6 to 136	3	2	CM007986.2	A
PgNAC092	Pgl_GLEAN_10011923_1	5	122008195	122009895	723	44 to 64	1	0	CM007986.2	C
PgNAC093	Pgl_GLEAN_10015220_1	5	124348450	124350280	316	11 to 137	1	0	CM007986.2	G
PgNAC094	Pgl_GLEAN_10015216_1	5	124490736	124492009	182	21 to 146	1	0	CM007986.2	F
PgNAC095	Pgl_GLEAN_10014388_1	5	141664639	141672561	177	74 to 205	1	0	CM007986.2	F
PgNAC096	Pgl_GLEAN_10037658_1	5	154600705	154602024	671	12 to 138	5	4	CM007986.2	G
PgNAC097	Pgl_GLEAN_10037715_1	5	155437294	155437994	381	6 to 133	3	2	CM007986.2	A
PgNAC098	Pgl_GLEAN_10037753_1	5	156052407	156051750	160	44 to 91; 140 to 176; 142 to 176	3	2	CM007986.2	C
PgNAC099	Pgl_GLEAN_10037765_1	5	156160974	156156336	409	7 to 133	3	2	CM007986.2	E
PgNAC100	Pgl_GLEAN_10032350_1	6	23628311	23626384	238	47 to 171	3	2	CM007987.2	C
PgNAC101	Pgl_GLEAN_10002592_1	6	24518415	24516433	302	7 to 132	13	12	CM007987.2	E
PgNAC102	Pgl_GLEAN_10031664_1	6	25475515	25476998	391	67 to 174; 138 to 174	3	2	CM007987.2	B
PgNAC103	Pgl_GLEAN_10020207_1	6	29295097	29293833	260	7 to 112	2	1	CM007987.2	E
PgNAC104	Pgl_GLEAN_10014236_1	6	43684255	43685428	103	22 to 148	2	1	CM007987.2	F
PgNAC105	Pgl_GLEAN_10021317_1	6	54113938	54112763	322	22 to 42	6	5	CM007987.2	F
PgNAC106	Pgl_GLEAN_10014855_1	6	82964172	82964954	154	9 to 144	2	1	CM007987.2	G
PgNAC107	Pgl_GLEAN_10014854_1	6	82970204	82970495	248	9 to 102	3	2	CM007987.2	G
PgNAC108	Pgl_GLEAN_10014826_1	6	83423715	83426629	517	179 to 206; 67 to 82	3	2	CM007987.2	A
PgNAC109	Pgl_GLEAN_10022180_1	6	88550532	88549987	342	7 to 133	4	3	CM007987.2	…….
PgNAC110	Pgl_GLEAN_10000878_1	6	103144365	103142817	356	11 to 134	5	4	CM007987.2	G
PgNAC111	Pgl_GLEAN_10015689_1	6	205185406	205188480	340	10 to 136	3	2	CM007987.2	…….
PgNAC112	Pgl_GLEAN_10008365_1	6	210827185	210829083	216	9 to 142	3	2	CM007987.2	E
PgNAC113	Pgl_GLEAN_10022220_1	6	211471279	211469946	396	33 to 159	1	0	CM007987.2	F
PgNAC114	Pgl_GLEAN_10022066_1	6	212499249	212498041	408	20 to 150	1	0	CM007987.2	J
PgNAC115	Pgl_GLEAN_10006878_1	6	221354296	221352834	357	128 to 158	1	0	CM007987.2	H
PgNAC116	Pgl_GLEAN_10006879_1	6	221362058	221360577	318	17 to 143	1	0	CM007987.2	I
PgNAC117	Pgl_GLEAN_10024653_1	6	232116031	232111001	350	158 to 186; 45 to 60	2	1	CM007987.2	B
PgNAC118	Pgl_GLEAN_10001899_1	6	236673234	236671934	424	58 to 206	4	3	CM007987.2	B
PgNAC119	Pgl_GLEAN_10007407_1	7	300291	298902	248	23 to 147	3	3	CM007988.2	B
PgNAC120	Pgl_GLEAN_10007416_1	7	399053	397480	251	16 to 141	3	2	CM007988.2	I
PgNAC121	Pgl_GLEAN_10016512_1	7	19916753	19918411	263	30 to 158	3	2	CM007988.2	D
PgNAC122	Pgl_GLEAN_10013199_1	7	32580670	32579924	218	14 to 158	3	2	CM007988.2	E
PgNAC123	Pgl_GLEAN_10013201_1	7	32704375	32703620	249	2 to 149	2	1	CM007988.2	E
PgNAC124	Pgl_GLEAN_10013202_1	7	32707635	32706844	260	13 to 150	4	3	CM007988.2	G
PgNAC125	Pgl_GLEAN_10030810_1	7	41331302	41329029	203	7 to 133	3	2	CM007988.2	E
PgNAC126	Pgl_GLEAN_10030809_1	7	41335848	41334021	313	7 to 134	6	5	CM007988.2	E
PgNAC127	Pgl_GLEAN_10020611_1	7	52730821	52729243	526	12 to 32	3	2	CM007988.2	K
PgNAC128	Pgl_GLEAN_10004340_1	7	84063768	84064515	361	47 to 72	4	3	CM007988.2	A
PgNAC129	Pgl_GLEAN_10030047_1	7	100945615	100946556	337	8 to 141	3	2	CM007988.2	D
PgNAC130	Pgl_GLEAN_10003109_1	7	107186632	107183355	336	10 to 30; 292 to 393; 272 to 355	3	2	CM007988.2	G
PgNAC131	Pgl_GLEAN_10019893_1	7	111692486	111691208	749	40 to 169	1	0	CM007988.2	B
PgNAC132	Pgl_GLEAN_10029143_1	7	135347645	135346455	338	10 to 141	1	0	CM007988.2	G
PgNAC133	Pgl_GLEAN_10032725_1	7	138398533	138401496	337	28 to 157	1	0	CM007988.2	D
PgNAC134	Pgl_GLEAN_10032709_1	7	138673596	138677564	750	10 to 135	3	2	CM007988.2	G
PgNAC135	Pgl_GLEAN_10025231	Scaffold 1063	94902	95892	327	20 to 146	3	2	LKME02022870.1	E
PgNAC136	Pgl_GLEAN_10025212	Scaffold 1063	1003593	1005580	293	9 to 135	3	2	LKME02022870.1	E
PgNAC137	Pgl_GLEAN_10011491	Scaffold 1203	201653	202887	387	9 to 122	2	1	LKME02022861.1	J
PgNAC138	Pgl_GLEAN_10011490	Scaffold 1203	210224	211654	342	10 to 141	1	0	LKME02022861.1	D
PgNAC139	Pgl_GLEAN_10002436	Scaffold 1622	94696	96815	333	8 to 122	3	2	LKME02008387.1	B
PgNAC140	Pgl_GLEAN_10003777	Scaffold 2427	8090	10898	206	22 to 163	3	2	LKME02018556.1	B
PgNAC141	Pgl_GLEAN_10030231	Scaffold 2474	173124	174233	370	16 to 21	3	2	LKME02014686.1	C
PgNAC142	Pgl_GLEAN_10030260	Scaffold 2474	446484	447672	337	7 to 133	3	2	LKME02014686.1	G
PgNAC143	Pgl_GLEAN_10030281	Scaffold 2474	690197	691498	434	1 to 27	5	4	LKME02014686.1	C
PgNAC144	Pgl_GLEAN_10030284	Scaffold 2474	731324	732460	379	9 to 138	……..	……..	LKME02014686.1	C
PgNAC145	Pgl_GLEAN_10030342	Scaffold 2474	1254014	1255526	159	2 to 94	5	4	LKME02014686.1	D
PgNAC146	Pgl_GLEAN_10017039	Scaffold 3094	378687	380276	530	24 to 150	1	0	LKME02014713.1	H
PgNAC147	Pgl_GLEAN_10017040	Scaffold 3094	394178	395767	530	65 to 121	1	0	LKME02014713.1	H
PgNAC148	Pgl_GLEAN_10014743	Scaffold 3470	216915	218178	335	8 to 126	3	2	LKME02010361.1	D
PgNAC149	Pgl_GLEAN_10008215	Scaffold 3773	91486	93031	196	26 to 164	4	3	LKME02004272.1	B
PgNAC150	Pgl_GLEAN_10002322	Scaffold 7552	83330	85254	404	62 to 116	4	3	LKME02021098.1	E
PgNAC151	Pgl_GLEAN_10004044	Scaffold 8799	186806	189294	495	36 to 91	5	4	LKME02021098.1	B
